# Supplementary material
Source: PubMed Central journal article supplement (PMC2605985)
Supplement: M803196200_1.pdf [file M803196200_1.pdf]

## SUPPLEMENTARY DATA

**Table 1: Antibodies used for WB, IP and ChIP analysis**

| <b>Antibody</b>           | <b>Source</b> | <b>Reactivity</b>          | <b>Company</b> | <b>Catalogue</b> | <b>Dilution</b> |
|---------------------------|---------------|----------------------------|----------------|------------------|-----------------|
| Anti-Mouse-AP conjugated  | Goat          | Mouse                      | Sigma          | A3562            | 2500            |
| Anti-Goat-AP conjugated   | Rabbit        | Goat                       | Sigma          | A2168            | 2500            |
| Anti-Rabbit-AP conjugated | Goat          | Rabbit                     | Sigma          | A3687            | 2500            |
| Anti-FLAG                 | Mouse         | Artificial peptide         | Sigma          | F3165            | 1000            |
| Anti-PBEF1 (NAMPT)        | Rabbit        | Human                      | Abcam          | Ab24149          | 700             |
| Anti-GAPDH                | Mouse         | Human, Mouse<br>Rat Rabbit | Abcam          | Ab9484           | 700             |
| Anti NMNAT1               | Goat          | Human, Mouse,<br>Rat       | Santa Cruz     | Sc-30841         | 500             |
| Anti RNA polIII           | Mouse         | Human, Mouse,<br>Rat       | Upstate        | 05-623           | 500             |
| Anti-SrT1                 | Rabbit        | Mouse, Human               | Upstate        | 07-131           | 1000            |
| Anti-act-H3               | Rabbit        | Mouse, Human               | Upstate        | 06-599           | 1000            |
| Anti-actK9K14,H3          | Rabbit        | Human, Mouse,<br>Rat       | Cell signaling | 9671             | 1000            |
| Anti-act lysine           | Rabbit        | All species                | Cell signaling | 9441             | 1000            |
| Anti-actK5,H4             | Rabbit        | Human                      | Upstate        | 07-327           | 500             |
| Anti-alpha Tubulin        | Mouse         | Human, Mouse,<br>Rat       | Santa Cruz     | Sc5286           | 1000            |
| Anti-PCAF                 | Rabbit        | Human, Mouse,<br>Dog       | Abcam          | Ab12188          | 500             |
| Anti-Sox9                 | Rabbit        | Human, mouse<br>cow        | Abcam          | Ab3697           | 500             |
| Anti-dimethyl-K9,H3       | Rabbit        | Human                      | Upstate        | 07521            | 1000            |
| Anti-PGC1 $\alpha$        | Rabbit        | mouse, rat and<br>human    | Santa Cruz     | Sc-13067         | 500             |
| Anit-IgG                  | Rabbit        | NA                         | Santa Cruz     | Sc-2027          | 500             |
| Anti-GCN5                 | Rabbit        | mouse, rat and<br>human    | Santa Cruz     | Sc-20698         | 500             |
| Anti- EF1 $\alpha$        | Mouse         | mouse, rat and<br>human    | Upstate        | 05-235           | 1000            |

**Table 2: Human primers for RT/PCR, siRNA and ChIP Analyses**

| Gene                               | Primers                                                                                 | Amplicon size (bp)         | Annealing Temp (°C) | Cycle # | Application |
|------------------------------------|-----------------------------------------------------------------------------------------|----------------------------|---------------------|---------|-------------|
| GAPDH                              | F 5'-CCA GGA CAT CAT CAT CCC TGC CTC TAC-3'<br>R 5'-GGT CTC TCT CTT CCT CTT GTG C-3'    | 452                        | 54                  | 25      | RT/PCR      |
| Col9( $\alpha$ 1)                  | F 5'-CTA CAT TGC AGG TGG CTT ACA A-3'<br>R 5'-GGA TTA TCT GCA AGT TTT CCC A-3'          | 516                        | 54                  | 35      | RT/PCR      |
| +Collagen 2( $\alpha$ 1)           | F 5'-CCG CGG TGA GCC ATG ATT CG-3'<br>R 5'-CAG GCC CAG GAG GTC CTT TGG G-3'             | 377(a-form)<br>171(b-form) | 57                  | 35      | RT/PCR      |
| Aggrecan                           | F 5'-AGG CTG GGG AGA GAA CTG AAA AG-3'<br>R 5'-GCT CAC AAT GGG GTA TCT GAC AG-3'        | 463                        | 57                  | 35      | RT/PCR      |
| COMP                               | F 5'-CAA CTG TCC CCA GAA GAG CAA-3'<br>R 5'-TGG TAG CCA AAG ATG ATG AAG CCC-3'          | 588                        | 57                  | 35      | RT/PCR      |
| SirT1                              | F 5'-GCT TAT TTG TCA GAG TTC CCA CCC-3'<br>R 5'-CAG CAT TTT CTC ACT GTT CCA GCC-3'      | 308                        | 60                  | 35      | RT/PCR      |
| NMNAT                              | F 5'-TCA TTC AAT CCC ATC AAC AA-3'<br>R 5'-CAC AAA TTG GGA ACA GCA AA-3'                | 461                        | 59                  | 35      | RT/PCR      |
| NAMPT                              | F 5'-TGA ATG CCG TGA AAA GAA GA-3'<br>R 5'-AAT TTG TTG CCA CTG TGA TT-3'                | 383                        | 57                  | 35      | RT/PCR      |
| GAPDH                              | F 5'-CAA GGC TGA GAA CGG GAA GC-3'<br>R 5'-AGG GGG CAG AGA TGA TGA CC-3'                | 194                        | 57                  | 40      | RT/PCR      |
| COMP                               | F 5'-TGT CCC CAG AAG AGC AAC CC-3'<br>R 5'-ATT GTC GTC GTC GTC GC-3'                    | 527                        | 59                  | 40      | RT/PCR      |
| Aggrecan                           | F 5'-TGC GGG TCA ACA GTG CCT ATC-3'<br>R 5'-CAC GAT GCC TTT CAC CAC GAC-3'              | 181                        | 59                  | 40      | RT/PCR      |
| *Collagen 2( $\alpha$ 1) Enhancer  | F 5'-ATC CTC CTT TGT GAG GCT TGT T-3'<br>R 5'-AGT ACG AGA GAA CCC ACT GGA C-3'          | 181                        | 62                  | 40      | ChIP        |
| **Collagen 2( $\alpha$ 1) Promoter | F 5'-AGC GTG ACT CCC AGA GAG G-3'<br>R 5'-CAG CGC TCT GCG TCT TCT-3'                    | 200                        | 62                  | 40      | ChIP        |
| GAPDH                              | F 5'-TAC TAG CGG TTT TAC GGG CG-3'<br>R 5'-TCG AAC AGG AGC AGA GAG CGA-3'               | 166                        | 59                  | 40      | ChIP        |
| PBEF siRNA Invitrogen              | S.5'-GGU GGG UUG UGU UGG UUU GAA AUA A-3'<br>AS.5'-CCA CCC AAC ACA AGC AAA GUU UAU U-3' | NA                         | NA                  | NA      | siRNA       |
| SirT1 siRNA Ambion                 | S.5'-GGC CAC GGA UAG GUC CAU A-3'<br>AS.5'-UAU GGA CCU AUC CGU GGC C-3'                 | NA                         | NA                  | NA      | siRNA       |
| CTL siRNA Qiagen (cat# 1027281)    | S.cat#229233<br>AS. cat#229234                                                          | NA                         | NA                  | NA      | siRNA       |
| Collagen 1( $\alpha$ 1)            | F 5'-GGA TTC CAG TTC GAG TAT GG-3'<br>R 5'-TGC AGT GGT AGG TGA TGT TC-3'                | 143                        | 55                  | 45      | RT/PCR      |
| Fibronectin 1                      | F 5'-GCC ATG TGT CTT ACC ATT CA-3'<br>R 5'-TGA ACC AAA ACA GTG TGG TC-3'                | 153                        | 55                  | 45      | RT/PCR      |
| p65 (NFkB)                         | F 5'-ATG GCT TCT ATG AGG CTG AG-3'<br>R 5'-CAC AGC ATT CAG GTC GTA GT-3'                | 182                        | 55                  | 45      | RT/PCR      |
| MMP1 human                         | F 5'-CTG GAG GAA ATC TTG CTC AT-3'<br>R 5'-CCC CGA TAT CAG TAG AAT GG-3'                | 171                        | 55                  | 45      | RT/PCR      |

+This set of primers will differentiate between the two splice variants of collagen 2( $\alpha$ 1); the a-form is 377 bp while the b-form is 171 bp.

\*These primers were used in the ChIP assay for the collagen 2( $\alpha$ 1) enhancer.

\*\*These primers were used in the ChIP assays for the collagen 2( $\alpha$ 1) promoter

**Supplementary Data. Dvir-Ginzberg et al., 2008**

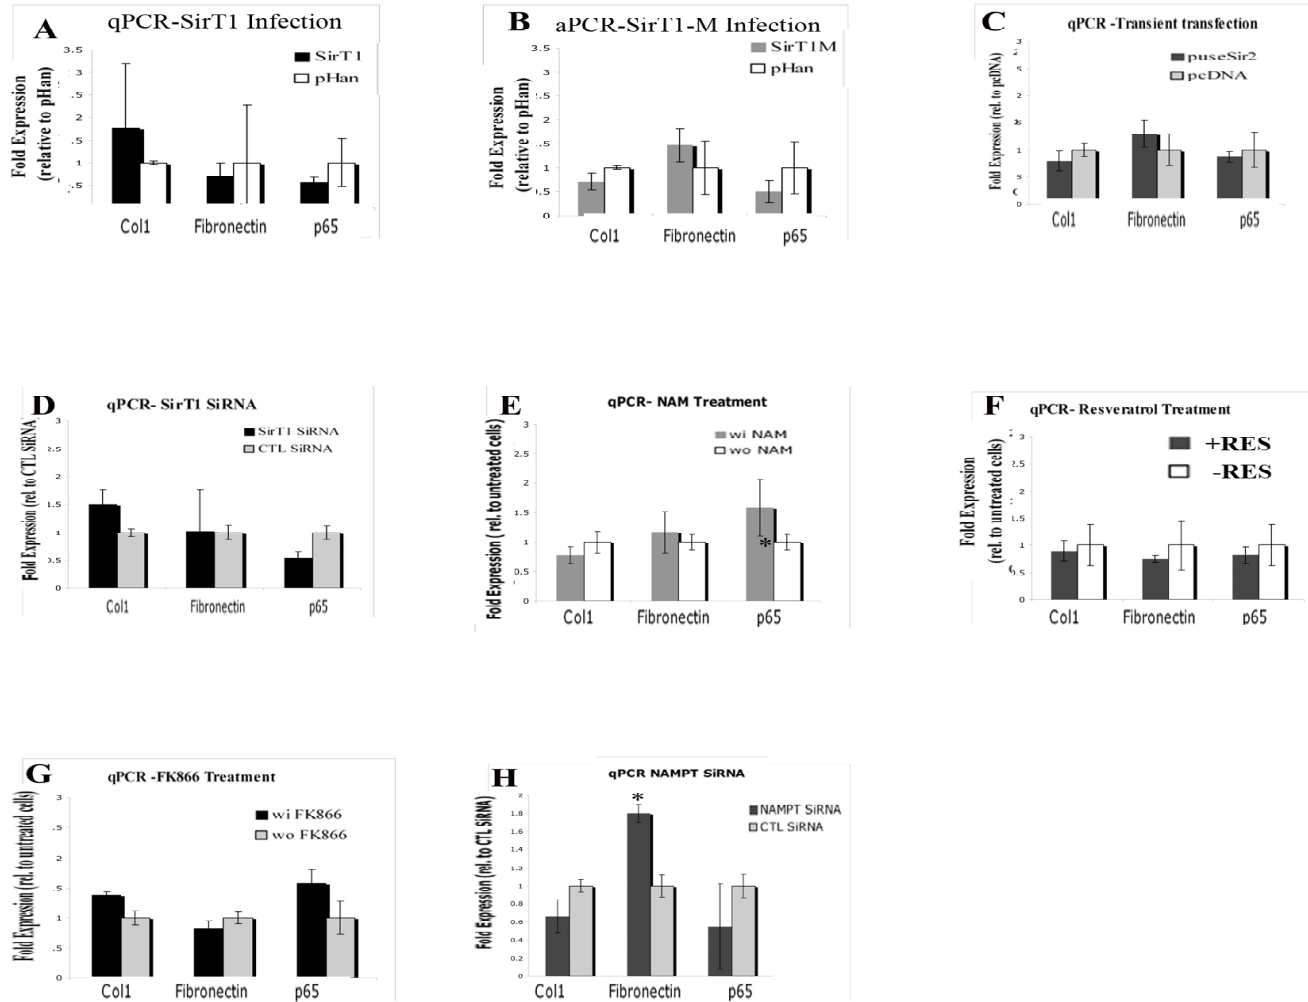

Figures A-H. qPCR for non-lineage specific genes. To verify that SirT1 on gene expression was specific for cartilage genes we also assessed expression of non-lineage specific genes such as collagen 1, fibronectin and p65(NFkB). In nearly all the treatment conditions shown these genes showed no significant changes in expression levels (LSD,  $p < 0.05$ ). The exceptions were that p65 was lower in sirT1 siRNA-treated cells and higher in NAMPT siRNA-treated cells.

Supplementary Data. Dvir-Ginzberg et al., 2008

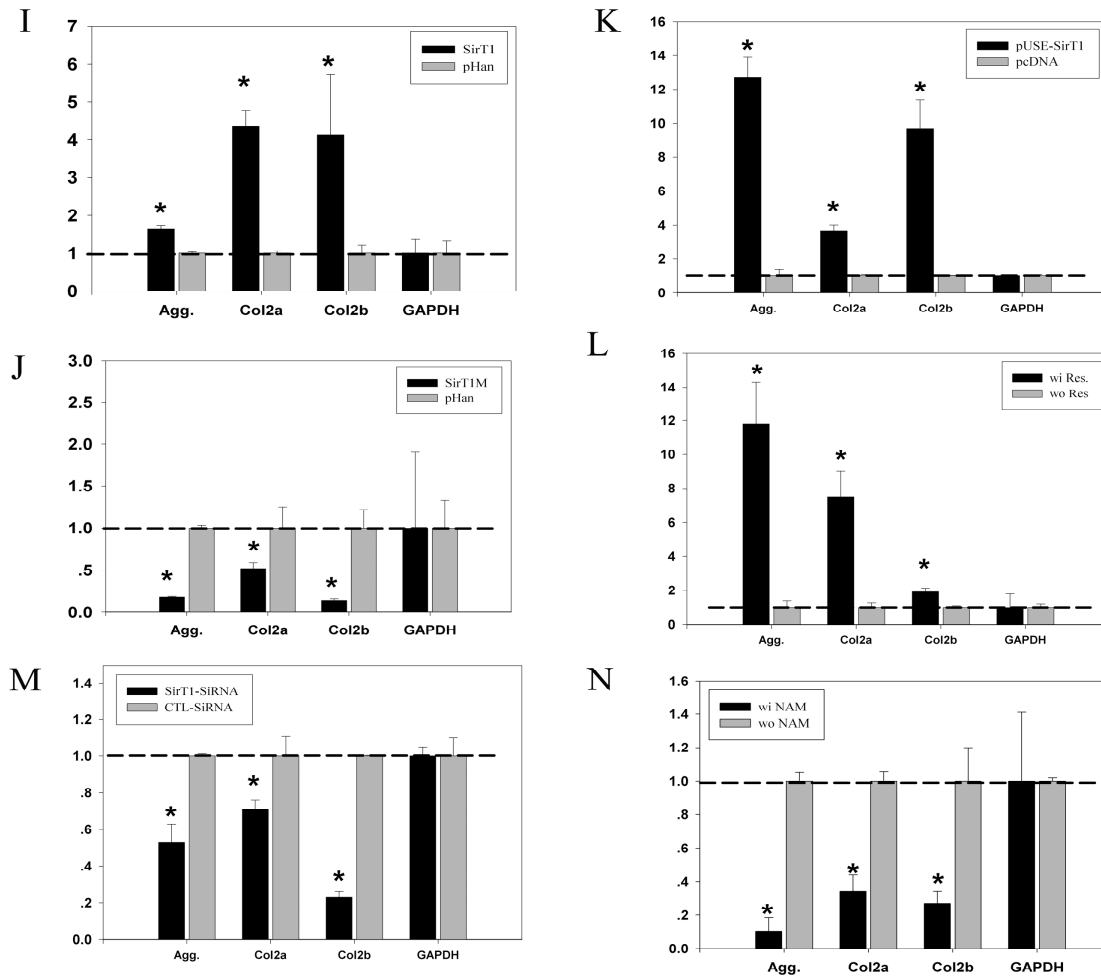

**Figures I-N. qPCR experiments for chondrocyte-specific gene expression.** All experiments were repeated via qPCR to confirm the results of the RT-PCR. The genes inspected were Aggrecan, Collagen2 and GAPDH as an internal control. In the stable and transient transfections with SirT1 (I, K, respectively) Expression of Aggrecan, Collagen 2a and Collagen 2b was found to be significantly higher than pHan vector control. The same genes were found to be suppressed in the SirT1M stable cells compared to the control (J). Resveratrol treated cells displayed elevated levels of Aggrecan and Collagen 2a as compared to untreated cells(L). NAM-treated cells showed a significant reduction in Aggrecan, Collagen 2a and Collagen 2b. Overall, the qPCR results are in agreement with a RT-PCR results. The results are averages of triplicates of 2 different experiments (n=6).

## Supplementary data

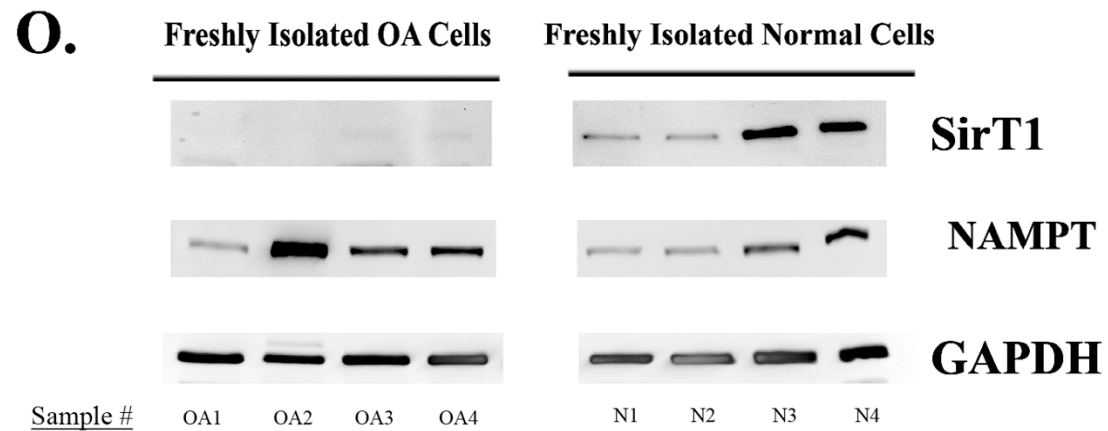

Figure O. Protein extracts were generated from chondrocytes freshly isolated (not passed in culture) from either cadavers (Normal) with no sign of arthritis (ave. age 73) or from osteoarthritic (OA) patients (ave age 62). The protein samples were immunoblotted and probed for SirT1, NAMPT and GAPDH. Results indicate higher levels of SirT1 expression in Normal versus OA chondrocytes while NAMPT expression levels appeared to be higher in the OA samples. Note that the cadaver chondrocytes were viable since they can proliferate in culture. Also, assessment of MMP13 expression shows that all the Normal samples did not express this gene while all the OA samples expressed high levels (data not shown).
